# Supplementary material
Source: HighWire-hosted journal article supplement (https://erj.ersjournals.com/content/59/5/2101402)
Supplement: inline-supplementary-material-1 [file inline-supplementary-material-1.pdf]

## **Supplementary material**

### **Short-acting $\beta_2$ -agonist prescriptions are associated with poor clinical outcomes of asthma: the multi-country, cross-sectional SABINA III study**

#### **SUPPLEMENTARY RESULTS**

##### *Patients without a SABA prescription*

Among patients not prescribed a SABA (n=3076), 89.2% had been prescribed ICS/LABA, and 11.4% reported having purchased SABA OTC during the past 12 months (supplementary table E3). A minority (2.3%) had received other treatments that might have been used for symptom relief (supplementary table E3). One or more bursts of oral corticosteroids (OCS) were prescribed for 25.4% of these patients, and 4.2% were prescribed long-term OCS treatment. Patients with no SABA prescriptions (vs those with  $\geq 1$  SABA prescriptions) were more likely to be classified at GINA step 3 or higher (82.7% vs 70.3%) (supplementary table E4) and less likely to have experienced  $\geq 1$  severe asthma exacerbation in the past year (35.0% vs 50.6%) (supplementary table E5).

## SUPPLEMENTARY FIGURES

### SUPPLEMENTARY FIGURE E1 Over-the-counter SABA purchases and prescriptions in patients with asthma

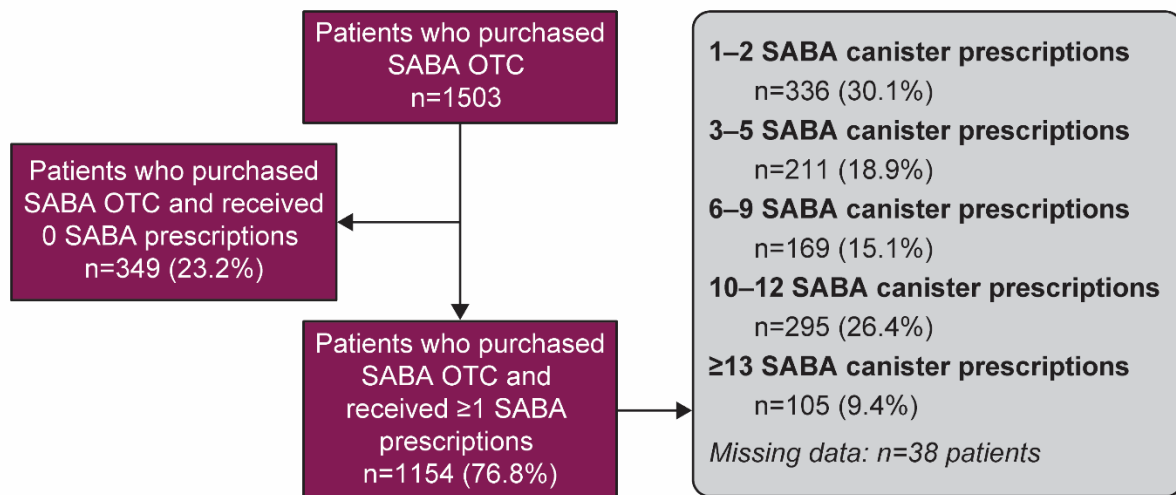

OTC: over the counter; SABA: short-acting  $\beta_2$ -agonist.

**SUPPLEMENTARY FIGURE E2** ICS canisters prescribed in the past year in patients on ICS monotherapy as controller\*

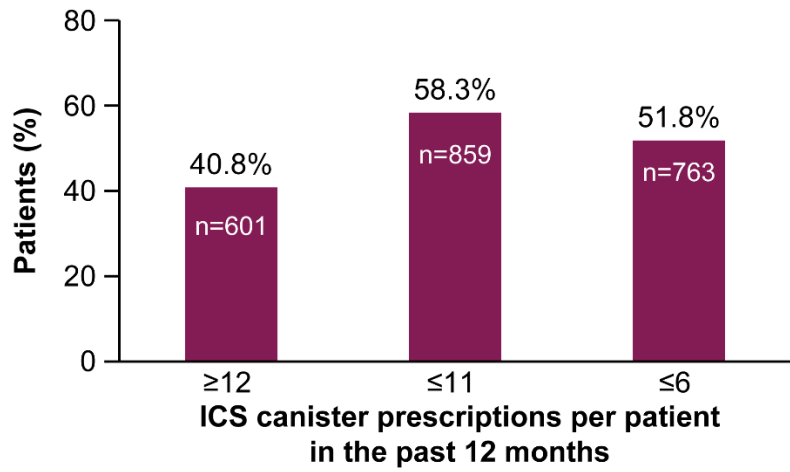

\*Of the 1473 patients prescribed ICS monotherapy, data on number of canisters prescribed were not available for 13 patients.

ICS: inhaled corticosteroid.

**SUPPLEMENTARY FIGURE E3** Patients included in the analyses for secondary objectives

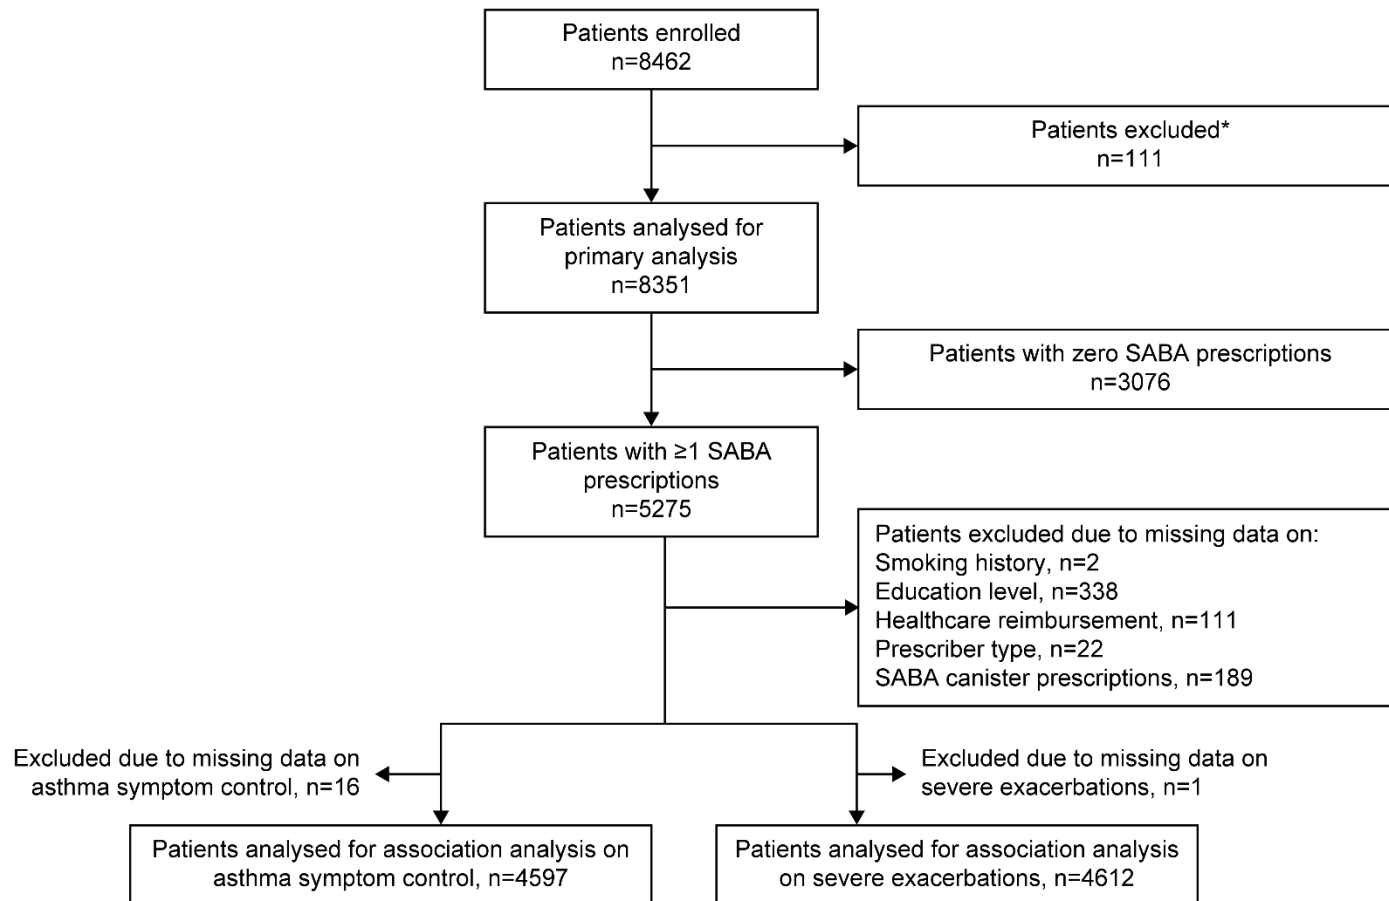

\*Excluded because the duration of asthma was <12 months.

SABA: short-acting  $\beta_2$ -agonist.

**SUPPLEMENTARY TABLE E1** List of SABINA III sites and investigators

| <b>Country</b> | <b>Site #</b>                      | <b>Investigator</b>            | <b>Affiliation</b>                                                 |
|----------------|------------------------------------|--------------------------------|--------------------------------------------------------------------|
| Australia      | AUS01                              | Florian Heraud                 | Optimum Patient Care<br>Australia                                  |
|                |                                    | Lenore Irvine                  | Optimum Patient Care<br>Australia                                  |
|                |                                    | Victoria Carter                | Optimum Patient Care<br>Australia                                  |
|                |                                    | David Price                    | Optimum Patient Care<br>Australia                                  |
| Costa Rica     | CRI01                              | Ted Mitchell<br>Brumley        | Laboratorio Función<br>Pulmonar, Centro Médico<br>Momentum Pinares |
|                | CRI02                              | María Felicia<br>Montero Arias | Hospital Clínica Bíblica, Sede<br>Santa Ana, San José              |
|                | CRI03                              | Carlos Estrada<br>Garzona      | Hospital CIMA San José                                             |
| Egypt          | EGY01                              | Adel Khattab                   | Ain Shams University                                               |
|                | EGY02                              | Ahmed Fathy                    | Chest Consultant Private<br>Clinic                                 |
|                | EGY03                              | Ahmed Hussien                  | Chest Consultant Private<br>Clinic                                 |
|                | EGY04                              | Samah Selim                    | IM Consultant Private Clinic                                       |
|                | EGY05                              | Assem el Essawy                | Fayoum University                                                  |
|                | EGY06                              | Reem el Korashy                | Cairo University                                                   |
|                | EGY07                              | Heba Helmy                     | Chest Consultant Private<br>Clinic                                 |
|                | EGY08                              | Ahmed Abd el<br>Hafeez         | Cairo University                                                   |
|                | EGY09                              | Ibrahim Khalil                 | Chest Consultant                                                   |
|                | EGY10                              | Mohamed Hanteera               | Tanta University                                                   |
|                | EGY11                              | Yasmine Hamdy                  | Cairo University                                                   |
|                | EGY12                              | Ashraf Madkour                 | Ain Shams University                                               |
|                | EGY13                              | Ashraf Okba                    | Ain Shams University                                               |
|                | EGY15                              | Gehan El Assal                 | Ain Shams University                                               |
|                | EGY16                              | Abdallah Shafik                | IM Consultant Private Clinic                                       |
|                | EGY17                              | Nabil Fawzy                    | IM Consultant Private Clinic                                       |
|                | EGY20                              | Ahmed Elsayed                  | Chest Consultant Health<br>Insurance                               |
|                | EGY21                              | Mostafa Shawki<br>Ahmed        | Ain Shams Specialized<br>Hospital                                  |
|                | EGY22                              | Ahmed El-Halafawy              | Cairo University                                                   |
|                | EGY25                              | Tarek Samy Essawy              | Chest Consultant Private<br>Clinic                                 |
| EGY27          | Lamiaa Hassan<br>Shaaban           | Assuit University              |                                                                    |
| EGY28          | Mohamed Fawzy<br>Abdelghany Yassin | Assuit University              |                                                                    |

| Country | Site # | Investigator                       | Affiliation                     |
|---------|--------|------------------------------------|---------------------------------|
|         | EGY29  | Ahmed Yousef Shaaban Gad           | Alex University                 |
|         | EGY30  | Mohamed Helmy Zidan                | Alex University                 |
|         | EGY32  | Ashraf Ishak Barsom                | Chest Consultant                |
|         | EGY33  | Mohamed EL-Shabrawy Mahmoudy       | Zagazig University              |
|         | EGY34  | Tarek Hamdy Hassan Abdel Hameed    | Zagazig University              |
|         | EGY35  | Ibrahim Aly Mohamed Dewedar        | Ain Shams University            |
|         | EGY36  | Ahmed Mohamed Abd el Hady Eldeeb   | Chest Consultant                |
|         | EGY37  | Hesham Salah Eldin Hamdy Mortada   | Chest Consultant                |
|         | EGY38  | Emad Edward Seif                   | Chest Consultant                |
|         | EGY39  | Abo Elmatey Elsherif               | IM Consultant Private Clinic    |
|         | EGY40  | Wagdy Abd Elfattah Mohamed         | Chest Consultant Private Clinic |
|         | EGY42  | Mohamed Eletreby                   | Mansoura University             |
|         | EGY43  | Mohamed Gamal Amer Elkholy         | Tanta University                |
| Kenya   | KEN01  | Lilian Rukwaro                     | Baraka Medical Centre           |
|         | KEN02  | Samuel Gathua                      | Menelik Chest Clinic            |
|         | KEN03  | Millicent Kamau                    | Reuben Medical Centre           |
|         | KEN04  | Jeremiah Chakaya                   | Fortis Clinic                   |
|         | KEN05  | Musa Mohammed Josephine Nguri      | Mama Lucy Kibaki Hospital       |
|         | KEN06  | Gituma                             | Mbagathi District Hospital      |
|         | KEN07  | Lucina Koyio                       | Kibera South Health Centre      |
|         | KEN08  |                                    | Kibera DO Health Centre         |
|         | KEN09  |                                    | APTC Dispensary                 |
|         | KEN10  |                                    | Riruta Health Centre            |
|         | KEN11  |                                    | Algadhir Medical Centre         |
|         | KEN12  |                                    | Eastleigh Health Centre         |
|         | KEN13  |                                    | Kasarani Health Centre          |
|         | KEN14  | Mogoi                              | Kayole II Health Centre         |
|         | KEN15  | Jared Mogaka                       | Mukuru Kwa Njenga Health Centre |
|         | KEN16  | Morris Maina                       | Embakasi Health Centre          |
|         | KEN17  | David Ndegwa (CDoH, Kiambu County) | Kiambu L5 Hospital              |

| Country  | Site # | Investigator                          | Affiliation                                                            |
|----------|--------|---------------------------------------|------------------------------------------------------------------------|
|          | KEN18  | David Ndegwa<br>(CDoH, Kiambu County) | Gatundu L5 Hospital                                                    |
|          | KEN19  | David Ndegwa<br>(CDoH, Kiambu County) | Tumutumu Medical Clinic                                                |
| Korea    | KOR01  | Yoo-Sook Cho                          | Asan Medical Center                                                    |
|          | KOR02  | Sang-Heon Kim                         | Hanyang University Seoul Hospital                                      |
|          | KOR03  | Yoon-Seok Chang                       | Seoul National University Bundang Hospital                             |
|          | KOR04  | Heung-Woo Park                        | Seoul National University Hospital                                     |
|          | KOR05  | Kwang-Ha Yoo                          | Konkuk University Medical Center                                       |
|          | KOR06  | Sang-Ha Kim                           | Wonju Severance Christian Hospital                                     |
|          | KOR07  | Ji-Yong Moon                          | Hanyang University Guri Hospital                                       |
|          | KOR08  | Hye-Kyoung Park                       | Pusan National University Hospital                                     |
|          | KOR09  | Sang-Pyo Lee                          | Gachon University Gil Medical Center                                   |
|          | KOR10  | An-Soo Jang                           | Soon Chun Hyang University Hospital Bucheon                            |
|          | KOR11  | Young-Mok Lee                         | GF Internal Medicine                                                   |
|          | KOR12  | Jeong-Eun Kim                         | Soo Internal Medicine Clinic                                           |
|          | KOR13  | Yang-Deok Lee                         | Leeyangdeok Clinic                                                     |
|          | KOR14  | Hui-Jung Kim                          | Goodbreath Medical Center                                              |
|          | KOR15  | Jeong-Cheol Gwon                      | Sanbon Yonsei Medical Clinic                                           |
|          | KOR16  | Hae-Ryun Ahn                          | Dami Internal Medicines                                                |
| Mexico   | MEX01  | Guillermo Meléndez Mier               | Trials in Medicine S.C., Mexico City, Mexico                           |
|          | MEX02  | Rocío Martina Barriga Acevedo         | Centro de Investigación Integral Medivest S.C., Chihuahua, Mexico      |
|          | MEX03  | José Carlos Herrera García            | Unidad de Investigación y Salud de Puebla, S.C. (UISP), Puebla, Mexico |
|          | MEX04  | Sandra Berenice Saavedra Sánchez      | Desarrollo ético en Investigación Clínica, Zapopan, Mexico             |
| Malaysia | MYS01  | Andrea Ban Yu-Lin                     | Universiti Kebangsaan Malaysia Medical Centre, Kuala Lumpur            |
|          | MYS02  | Mohd Arif Mohd Zim                    | Universiti Teknologi Mara (UiTM) Selayang, Selayang                    |

| Country | Site #      | Investigator                     | Affiliation                                                           |
|---------|-------------|----------------------------------|-----------------------------------------------------------------------|
|         | MYS03       | Syazatul Syakirin<br>Sirol Aflah | Institut Perubatan Respiratori,<br>Kuala Lumpur                       |
|         | MYS04       | Ummi Nadira Daut                 | Hospital Serdang, Kajang                                              |
|         | MYS05       | Irfhan Ali Hyder Ali             | Hospital Pulau Pinang, George<br>Town                                 |
|         | MYS06       | Lalitha Pereirasamy              | Hospital Seberang Jaya,<br>Permatang Pauh                             |
|         | MYS07       | Azza Omar                        | Hospital Raja Perempuan<br>Zainab II, Kota Bharu                      |
|         | MYS08       | Aishah Ibrahim                   | Hospital Tengku Ampuan<br>Afzan, Kuantan                              |
|         | MYS09       | Noor Aliza Mohd<br>Tarekh        | Hospital Sultanah Aminah,<br>Johor Bahru                              |
|         | MYS10       | Chan Swee Kim                    | Hospital Umum Sarawak,<br>Kuching                                     |
|         | MYS11       | Sri Wahyu Taher                  | Klinik Kesihatan Simpang<br>Kuala, Alor Setar                         |
|         | MYS12       | Paranthaman<br>Vengadasalam      | Klinik Kesihatan Greentown,<br>Ipoh                                   |
|         | MYS13       | Norsiah Ali                      | Klinik Kesihatan Masjid<br>Tanah, Melaka                              |
|         | MYS14       | Nor Azila Mohd Isa               | Klinik Kesihatan Nilai, Nilai                                         |
|         | MYS15       | Husni Hussain                    | Klinik Kesihatan Salak,<br>Sepang                                     |
|         | MYS15       | Noraziah Abdul<br>Karim          | Klinik Kesihatan Salak,<br>Sepang                                     |
|         | Philippines | PHL01                            | Dina V. Diaz                                                          |
| PHL02   |             | Leilanie A.<br>Nicodemus         | FMAB Qualimed                                                         |
| PHL03   |             | Evangeline L.<br>Parena-Santiago | Batangas Medical Center                                               |
| PHL04   |             | Marie Elaine V.<br>Capalla       | West Visayas University<br>Hospital                                   |
| PHL05   |             | Ronnie Z. Samoro                 | Healthlink Medical, Surgical,<br>Dental Clinic & Diagnostic<br>Center |
| PHL06   |             | Bryna Kimberly<br>Bayate-Jabines | Western Visayas Medical<br>Center                                     |
| PHL07   |             | Jessie F. Orcasitas              | Metro Davao Medical and<br>Research Center                            |
| PHL08   |             | Miranila Hernandez-<br>Matibag   | The Medical City                                                      |
| PHL09   |             | Ronnel S. Matibag                | M&R Santos Clinic                                                     |
| PHL10   |             | Janet C. Bernardo                | Davao Doctors Hospital                                                |
| Russia  | RUS01       | Natalia Kostina                  | Voronezh regional clinical<br>Hospital No 1                           |



| Country | Site #      | Investigator                  | Affiliation                                                                   |
|---------|-------------|-------------------------------|-------------------------------------------------------------------------------|
|         | RUS02       | Amyrzhan Kulbaisov            | Orenburg Regional Clinical Hospital No 2                                      |
|         | RUS03       | Dmitry Tikhanov               | Pokrovskaya Hospital, St. Petersburg                                          |
|         | RUS04       | Elena Vankova                 | Clinical Hospital No 2, Kazan                                                 |
|         | RUS05       | Marina Boldina                | City Hospital №28, Pulmonology Consultant Center, Nizhny Novgorod             |
|         | RUS06       | Irina Costrova                | Amur State Medical Academy, Blagoveschensk                                    |
|         | RUS07       | Irina Zaykova-Khelimskaya     | Railway Clinical Hospital at Khabarovsk-1 Station                             |
|         | RUS08       | Ekaterina Kochegarova         | Far East Scientific Center of Breath Physiology and Pathology, Blagoveschensk |
|         | RUS09       | Igor Leshchenko               | Ural State Medical University, Medical Union "Novaya bolnitsa", Ekaterinburg  |
|         | RUS10       | Galina Ignatova               | South Ural State Medical University Chelyabinsk                               |
|         | RUS11       | Sergey Avdeev                 | First Moscow State Medical University, Moscow                                 |
|         | RUS12       | Sergey Skalsky                | City Emergency Clinical Hospital № 1 Omsk                                     |
|         | UAE         | UAE01                         | Ashraf Al Zaabi                                                               |
| UAE01   |             | Rohit Pradhan                 | Pulmonology Department, Zayed Military Hospital, Abu Dhabi, UAE               |
| UAE01   |             | Fayeza Alameri                | Family Medicine Department, Zayed Military Hospital, Abu Dhabi, UAE           |
| UAE02   |             | Moulham Ashtar                | Al Badaa PHC, DHA-Dubai, UAE                                                  |
| UAE02   |             | Noorah Bawady                 | Al Badaa PHC, DHA-Dubai, UAE                                                  |
| UAE02   |             | Amani Bayoumi                 | Al Badaa PHC, DHA-Dubai, UAE                                                  |
| UAE02   |             | Shatha Al Suwaidi             | Al Mankhool PHC, DHA-Dubai, UAE                                               |
| UAE02   |             | Amal Al Zaabi                 | AL Towar PHC, DHA-Dubai, UAE                                                  |
| UAE02   |             | Leila Osman                   | AL Towar PHC, DHA-Dubai, UAE                                                  |
| UAE02   | Aisha Salim | Al Mamzar PHC, DHA-Dubai, UAE |                                                                               |

| Country      | Site # | Investigator        | Affiliation                                                   |
|--------------|--------|---------------------|---------------------------------------------------------------|
|              | UAE02  | Safeya AlKaabi      | Al Mamzar PHC, DHA-Dubai, UAE                                 |
|              | UAE03  | Fathelrahman Shandy | Pulmonology Department, Rashid Hospital, DHA-Dubai, UAE       |
|              | UAE10  | Nassem Ibrahim      | Khalidiya MOH PHC, Sharjah, UAE                               |
|              | UAE11  | Hala Boushra        | Al Riqqa MOH PHC, Sharjah, UAE                                |
|              | UAE12  | Naim Hazzouri       | Al Muhasinah MOH PHC, Dubai, UAE                              |
| Kuwait       | KWT01  | Saleh AlMutairi     | Al Adan Hospital, Kuwait                                      |
|              | KWT01  | Mohamed Negm        | Al Adan Hospital, Kuwait                                      |
|              | KWT02  | Khaled Hegazy       | Sabah El Salem PHC, Kuwait                                    |
|              | KWT03  | Mohamed Samir       | Rumaitheya PHC, Kuwait                                        |
|              | KWT04  | Khaled Khudadah     | Ahmadi Hospital, Kuwait                                       |
| Oman         | OMN01  | Nasser Al Busaidi   | Royal Hospital, Muscat – Sultanate of Oman                    |
|              | OMN01  | Nabil Al Lawati     | Royal Hospital, Muscat – Sultanate of Oman                    |
|              | OMN01  | Asmahan Alyaqoubi   | Royal Hospital, Muscat – Sultanate of Oman                    |
| Saudi Arabia | SAU01  | Abdulmajed Arwadi   | Principal Investigator, Specialized Medical Center            |
|              |        | Mohammed Mahmoud    | Sub Investigator, Specialized Medical Center                  |
|              |        | Joana Diesca        | Study Coordinator, Specialized Medical Center                 |
|              | SAU02  | Tarek Dihan         | Principal Investigator, King Fahad Specialist Hospital Dammam |
|              |        | Lamees Gain         | Study Coordinator, King Fahad Specialist Hospital Dammam      |
|              |        | Zakaria Basbous     | Study Coordinator, King Fahad Specialist Hospital Dammam      |
|              |        | Manal Alhazmi       | Sub Investigator, King Fahad Specialist Hospital Dammam       |
|              |        | Hussain Aldhamen    | Sub Investigator, King Fahad Specialist Hospital Dammam       |
|              |        | Mahammad Awadalla   | Study Coordinator, King Fahad Specialist Hospital Dammam      |
|              | SAU08  | Riyad Al-Lehebi     | Principal Investigator, Kind Fahad Medical City -Riyadh       |

| <b>Country</b> | <b>Site #</b> | <b>Investigator</b>        | <b>Affiliation</b>                                              |
|----------------|---------------|----------------------------|-----------------------------------------------------------------|
|                |               | Huda Al-Shammari           | Study Coordinator, Kind Fahad Medical City -Riyadh              |
|                |               | Abdulhadi Al-Qahtani       | Study Coordinator, Kind Fahad Medical City -Riyadh              |
|                | SAU07         | Abeer Alharbi              | Principal Investigator, King Fahad General Hospital- Al Madinah |
|                |               | Mohammed Abd Elgawad Habeb | Sub Investigator, King Fahad General Hospital- Al Madinah       |
|                | SAU-05        | Siraj O. Wali              | Principal Investigator, King Abdulaziz University Hospital      |
|                |               | Faris Alhejaili            | Sub Investigator, King Abdulaziz University Hospital            |
|                |               | Walaa Abuzahra             | Study Coordinator, King Abdulaziz University Hospital           |
|                |               | Ibrahim Zakaria            | Sub Investigator, King Abdulaziz University Hospital            |
|                | SAU06         | Hamdan Al-Jahdali          | Principal Investigator, King Abdulaziz Medical City - Riyadh    |
|                |               | Amber Azhar                | Sub Investigator, King Abdulaziz Medical City - Riyadh          |
|                |               | Hajar Alhayyan             | Sub Investigator, King Abdulaziz Medical City - Riyadh          |
|                |               | Abdelkarim Saad            | Sub Investigator, King Abdulaziz Medical City - Riyadh          |
|                |               | Huda Elatrash              | Study Coordinator, King Abdulaziz Medical City - Riyadh         |
|                |               | Ala'a Khalifah             | Study Coordinator, King Abdulaziz Medical City - Riyadh         |
|                | SAU03         | Amr AlBanna                | Principal Investigator, King Abdulaziz Medical City - Jeddah    |
|                |               | Mohammed Alrageh           | Sub Investigator, King Abdulaziz Medical City - Jeddah          |
|                | South Africa  | ZAF01                      | Anish Ambaram                                                   |

| <b>Country</b> | <b>Site #</b> | <b>Investigator</b>       | <b>Affiliation</b>                                                 |
|----------------|---------------|---------------------------|--------------------------------------------------------------------|
|                | ZAF02         | Clifford Smith            | Rochester Place, 173 Rivonia Road, Morningside, 2196, Johannesburg |
|                | ZAF03         | David Bernhardt           | MD Search, Boksburg North, GP                                      |
|                | ZAF04         | Essack Mitha              | Newgate Centre, Newtown, Johannesburg, GP                          |
|                | ZAF05         | Ismail Abdullah           | Melomed Gatesville Hospital, Gatesville, Cape Town                 |
|                | ZAF06         | Ismail Aboobaker Abdullah | St. Augustine's Hospital Berea, Durban                             |
|                | ZAF07         | Jeevren Reddy             | 26 Daffodil Street, Stanger, 4450<br>Kwa-Zulu Natal                |
|                | ZAF08         | Julien Trokis             | Langeberg Medical Centre, Kraaifontein, Cape Town                  |
|                | ZAF09         | Muhammed Fulat            | Clinical Trial Systems, East Lynne, Pretoria                       |
|                | ZAF10         | Padaruth Ramlachan        | Newkwa Medical Centre, Durban, KZN                                 |
|                | ZAF11         | Uttam Govind              | Randles Road Medical Centre Sydenham, Durban, KZN                  |
|                | ZAF12         | Michael van der Linden    | Ethekwini Hospital & Heart Centre, Newlands East, KZN              |
| Argentina      | ARG01         | Mattarucco, Javier Walter | Centro Profesional San Salvador (CEPROSS), Entre Ríos              |
|                | ARG02         | Altieri, Hector Hugo      | Centro Integral de Medicina Respiratoria (CIMER), Tucumán          |
|                | ARG03         | Goffredo, Hernán Diego    | Htal Regional Dr Victor Sanguinetti, Comodoro Rivadavia, Chubut    |
|                | ARG04         | Grilli, Monica            | Hospital Español de Mendoza, Mendoza                               |
|                | ARG05         | Zunino, Sergio Daniel     | Hospital Italiano de Bs As, CABA                                   |
|                | ARG06         | Silva, Damian             | Centro de Estudios Neumonológicos Tandil, Buenos Aires             |
|                | ARG07         | Solis, Marco Antonio      | Sanatorio Güemes, CABA                                             |
|                | ARG08         | Emery, Nicholas           | Hospital Británico, CABA                                           |
| Chile          | CHI01         | Martinez Hagen, Victor    | Centro de Investigación Curicó, Curicó, Región del Maule           |

| Country  | Site #   | Investigator                       | Affiliation                                                                                                                           |
|----------|----------|------------------------------------|---------------------------------------------------------------------------------------------------------------------------------------|
|          | CHI02    | Schönffeldt, Patricia              | Sociedad Medica SyG SpA, Santiago                                                                                                     |
|          | CHI03    | Juana Pavie                        | Centro Respiratorio Integral Limitada, Quillota, Región de Valparaíso                                                                 |
| Colombia | COL01    | Caballero Pinilla, Andrea Carolina | Caja de Compensación Familiar CAFAM, Sede Centro de Atención en Salud CAFAM Floresta                                                  |
|          | COL02    | Jaller Raad, Rodolfo Antonio       | Centro de Investigación Médico Asistencial S.A.S.                                                                                     |
|          | COL03    | Reynales, Humberto                 | Centro de Atención e Investigación Médica - CAIMED                                                                                    |
|          | COL054   | Pedrozo-Pupo, John Carlos          | Previcare Ltda. Instituto para Cuidado Respiratorio (Respire)                                                                         |
|          | COL06    | Baños Álvarez, Iván de Jesús       | Centro de Rehabilitación Pulmonar Integral S.A.S.                                                                                     |
|          | COL07    | Eastmond Mahecha, James Junior     | Healthy Medical Center S.A.S.                                                                                                         |
|          | COL08    | Pacheco Gallego, Manuel Conrado    | Universidad Tecnológica de Pereira<br>Universidad Visión de las Américas<br>Respiremos Centro de Neumología y Endoscopia Respiratoria |
|          | Thailand | THA01                              | Theerakorn Theerakittikul                                                                                                             |
| THA04    |          | Anuchit Niyompattama               | Maharaj Nakhon Ratchasima Hospital, Nakhon Ratchasima                                                                                 |
| THA05    |          | Narongwit Nakwan                   | Hatyai Hospital, Songkla                                                                                                              |
| Turkey   | TUR01    | Nejat Altıntaş                     | Tekirdag Namık Kemal University Faculty of Medicine, Tekirdağ                                                                         |
|          | TUR02    | İsmet Bulut                        | Sureyyapasa Chest Diseases and Thoracic Surgery Training Hospital, İstanbul                                                           |
|          | TUR03    | Tülin çağatay                      | Istanbul University, Istanbul Faculty of Medicine (ÇAPA)                                                                              |
|          | TUR04    | Bilün Gemicioğlu                   | Istanbul University Cerrahpasa Faculty of Medicine                                                                                    |
|          | TUR05    | Özgür İnce                         | Samsun Medicana International Hospital, Samsun                                                                                        |
|          | TUR06    | Kıvılcım Oğuzülgen                 | Gazi University Faculty of Medicine, Ankara                                                                                           |

| Country | Site # | Investigator           | Affiliation                                                                             |                                                            |
|---------|--------|------------------------|-----------------------------------------------------------------------------------------|------------------------------------------------------------|
|         | TUR07  | Dilşad Mungan          | Ankara University School of Medicine, Ankara                                            |                                                            |
|         | TUR08  | Fusun Kalpaklıođlu     | Kirikkale University School of Medicine, Kirikkale                                      |                                                            |
|         | TUR09  | Kurtuluş Aksu          | Ataturk Chest Diseases Training and Research Hospital, Ankara                           |                                                            |
|         | TUR10  | Murat Altuntaş         | Zonguldak State Hospital, Zonguldak                                                     |                                                            |
|         | TUR11  | Ferda Öner Erkeköl     | Yildirim Beyazit University Faculty of Medicine, Ankara                                 |                                                            |
|         | TUR12  | Gül Karakaya           | Hacettepe University Faculty of Medicine, Ankara                                        |                                                            |
|         | TUR13  | İsmail Hanta           | Çukurova University Faculty of Medicine, Adana                                          |                                                            |
|         | TUR14  | Adviye Özer            | Adana Seyhan State Hospital, Adana                                                      |                                                            |
|         | TUR15  | Sibel Atış Nayci       | Mersin University Faculty of Medicine, Mersin                                           |                                                            |
|         | TUR16  | Gazi Gülbaş            | Inonu University Faculty of Medicine, Malatya                                           |                                                            |
|         | TUR17  | Mecit Süerdem          | Selcuk University Faculty of Medicine, Konya                                            |                                                            |
|         | TUR18  | Ayşe Arzu Yorgancıođlu | Celal Bayar University Faculty of Medicine, Manisa                                      |                                                            |
|         | TUR19  | Emel Ceylan            | Adnan Menderes University Faculty of Medicine, Aydın                                    |                                                            |
|         | TUR20  | Aykut Çilli            | Akdeniz University Faculty of Medicine, Antalya                                         |                                                            |
|         | TUR21  | Fuat Erel              | Balikesir University Faculty of Medicine, Balıkesir                                     |                                                            |
|         | TUR22  | Can Sevinç             | Dokuz Eylul University Faculty of Medicine, İzmir                                       |                                                            |
|         | TUR24  | Ceyda Anar             | Dr. Suat Seren Chest Disease and Thoracic Surgery Training and Research Hospital, İzmir |                                                            |
|         | TUR25  | Dane Ediger            | Uludag University Faculty of Medicine, Bursa                                            |                                                            |
|         | India  | IND01                  | Kavita Mody                                                                             | Dr Kavita Mody's Clinic, Chembur East, Mumbai, Maharashtra |
|         |        | IND02                  | Mahavir Modi                                                                            | Modi Clinic Chest & ENT, Dhanakwadi, Pune                  |
| IND03   |        | Manoj Singh            | Apollo Hospital, Gandhinagar, Gujarat                                                   |                                                            |
| IND04   |        | Mahesh P.A.            | JSS Medical College, Mysuru, Karnataka                                                  |                                                            |

| <b>Country</b> | <b>Site #</b> | <b>Investigator</b> | <b>Affiliation</b>                                                                                                                                                        |
|----------------|---------------|---------------------|---------------------------------------------------------------------------------------------------------------------------------------------------------------------------|
|                | IND05         | Lata Sharma         | KIMS Hospital Secunderabad, Hyderabad, Telangana                                                                                                                          |
|                | IND06         | Pramod Jhavar       | Jhavar Chest, Allergy, Asthma & Bronchoscopy, Sleep Study Centre<br>Indore                                                                                                |
|                | IND08         | Sudhir Kumar        | Ramkrishna Hospital, Patna                                                                                                                                                |
|                | IND09         | Aruna Kumari Badam  | Apollo Hospitals Jubilee Hills, Hyderabad                                                                                                                                 |
|                | IND10         | Giriyanna Gowda     | Allergy and Asthma Clinic, 4D Diagnostics and Polyclinic, Bangalore                                                                                                       |
|                | IND11         | Manav Manchanda     | Asian Institute of Medical Sciences<br>Faridabad, Haryana                                                                                                                 |
|                | IND12         | Manisha Mendiratta  | Sarvodaya Hospital & Research Center, Faridabad-121006                                                                                                                    |
|                | IND13         | Sandeep Nayar       | Dr B. L Kapur Memorial Hospital, AARCE, New Delhi                                                                                                                         |
| Taiwan         | TWN01         | Chang-Wen Chen      | Section of Chest Medicine, Department of Internal Medicine, National Cheng Kung University Hospital, College of Medicine, National Cheng Kung University, Tainan, Taiwan, |
|                | TWN02         | Chun Hui            | Department of Chest Medicine, Cheng Ching Hospital (Chung Kang Branch), Taichung                                                                                          |
|                | TWN03         | Cheng-Yi Wang       | Department of Internal Medicine, Cardinal Tien Hospital, New Taipei City                                                                                                  |
|                | TWN04         | Chou-Chin Lan       | Division of Pulmonary Medicine, Taipei Tzu Chi Hospital, New Taipei City                                                                                                  |
|                | TWN05         | Chia-Mo Lin         | Division of Chest Medicine, Shin Kong Memorial Wu Ho-Su Hospital, Taipei                                                                                                  |
|                | TWN06         | Jiunn-Min Shieh     | Department of Pulmonary Medicine, Chi Mei Medical Center, Tainan                                                                                                          |
|                | TWN07         | Sheng-Yeh Shen      | Division of Pulmonary Medicine, MacKay Memorial Hospital, Taipei                                                                                                          |

| Country   | Site #  | Investigator               | Affiliation                                                                                                      |
|-----------|---------|----------------------------|------------------------------------------------------------------------------------------------------------------|
|           | TWN08   | Ming-Huang Chiu            | Department of Respiratory and Chest Medicine, Cathay General Hospital, Taipei                                    |
|           | TWN09   | Shao-Hao Wu                | Division of Chest Medicine, Department of Internal Medicine, Taipei City Hospital (Zhongxiao Branch), Taipei     |
|           | TWN10   | Yi-Jen Chen                | Department of Chest Medicine, Ditmanson Medical Foundation Christian Hospital Chia-Yi Christian Hospital, Chiayi |
| Singapore | SGP01   | Tan Tze Lee                | The Edinburgh Clinic                                                                                             |
|           | SGP02   | Suraj Kumar                | Drs. Bain and Partners                                                                                           |
|           | SGP03   | Lim Hui Fang               | National University Hospital                                                                                     |
|           | SGP03   | Geraldine Wong             | National University Hospital                                                                                     |
|           | SGP04   | Joanne Khor Huiyi          | National University Polyclinic                                                                                   |
|           | SGP05   | David Tan Hsien Yung       | National University Polyclinic                                                                                   |
|           | SGP05   | Tan Wee Hian               | National University Polyclinic                                                                                   |
| Indonesia | IDN01   | Djajalaksana, Susanthy     | Saiful Anwar Hospital - Malang                                                                                   |
|           | IDN01.1 | Djajalaksana, Susanthy     | Saiful Anwar Hospital – Lawang Hospital - Malang                                                                 |
|           | IDN01.2 | Djajalaksana, Susanthy     | Saiful Anwar Hospital – Puskesmas Kendal Kerep - Malang                                                          |
|           | IDN01.3 | Djajalaksana, Susanthy     | Saiful Anwar Hospital - Lavalette Hospital - Malang                                                              |
|           | IDN02   | Amin, Muhammad             | Airlangga University Hospital - Surabaya                                                                         |
|           | IDN03   | Wiyono, Wiwien Heru        | Persahabatan National Respiratory Referral Hospital - Jakarta                                                    |
|           | IDN04   | Tarigan, Amira Permatasari | University of Sumatera Utara Hospital – Medan                                                                    |
|           | IDN04.2 | Tarigan, Amira Permatasari | University of Sumatera Utara Hospital - Aviati Jamin Ginting Clinic - Medan                                      |
|           | IDN05   | Susanti, Febrina           | Budhi Asih Hospital – Jakarta                                                                                    |
|           | IDN05.1 | Susanti, Febrina           | Budhi Asih Hospital - Puskesmas Kecamatan Cawang - Jakarta                                                       |
| Brazil    | BRA01   | Martti Anton Antila        | Martti Antila Allergy Clinic                                                                                     |
|           | BRA02   | Adelmir de Souza Machado   | PROAR Foundation                                                                                                 |



| <b>Country</b> | <b>Site #</b> | <b>Investigator</b>                | <b>Affiliation</b>                                                   |
|----------------|---------------|------------------------------------|----------------------------------------------------------------------|
|                | BRA03         | Daniela Cavalet Blanco             | São Lucas Hospital of PUC-RS                                         |
|                | BRA04         | Elie Fiss                          | CEPES - ABC Medical School                                           |
|                | BRA05         | Gilmar Alves Zonzin                | Santa Maria Medical Center - Medical Services BREATHE Sul Fluminense |
|                | BRA06         | José Laerte Júnior Boechat Morandi | Antonio Pedro University Hospital of Fluminense University           |
|                | BRA07         | Marcelo Fouad Rabahi               | CLARE Clinic<br>Pneumology Clinic S/S                                |
|                | BRA08         | Marcelo Gervilla Gregório          | Respsono Clinic<br>NETSPIRO Serviços Médicos S/A                     |
|                | BRA09         | Suzana Erico Tanni Minamoto        | UPCLIN - Botucatu Medical School/UNESP                               |
|                | BRA10         | Waldo Mattos                       | Nossa Senhora da Conceição Hospital                                  |

SABINA: SABA use IN Asthma.

**TABLE E2** SABA and ICS medication prescriptions in the past 12 months

|                                                                                  | All<br>(n=8351) | Primary care<br>(n=1440)                              |                                                                         |                 | Specialists<br>(n=6872)                                |                                                                          |                 |
|----------------------------------------------------------------------------------|-----------------|-------------------------------------------------------|-------------------------------------------------------------------------|-----------------|--------------------------------------------------------|--------------------------------------------------------------------------|-----------------|
|                                                                                  |                 | Investigator-<br>classified mild<br>asthma<br>(n=743) | Investigator-<br>classified<br>moderate-to-<br>severe asthma<br>(n=695) | All<br>(n=1440) | Investigator-<br>classified mild<br>asthma<br>(n=1210) | Investigator-<br>classified<br>moderate-to-<br>severe asthma<br>(n=5660) | All<br>(n=6872) |
| <b>Patients prescribed SABA monotherapy, n (%)</b>                               |                 |                                                       |                                                                         |                 |                                                        |                                                                          |                 |
| Yes                                                                              | 428 (5.1)       | 183 (24.6)                                            | 0 (0)                                                                   | 183 (12.7)      | 224 (18.5)                                             | 18 (0.3)                                                                 | 242 (3.5)       |
| No                                                                               | 7923 (94.9)     | 560 (75.4)                                            | 695 (100.0)                                                             | 1257 (87.3)     | 986 (81.5)                                             | 5642 (99.7)                                                              | 6630 (96.5)     |
| <b>Number of canisters or inhalers per patient prescribed in the past year</b>   |                 |                                                       |                                                                         |                 |                                                        |                                                                          |                 |
| Number of patients                                                               | 422             | 180                                                   | 0                                                                       | 180             | 222                                                    | 17                                                                       | 239             |
| Mean (SD)                                                                        | 5.8 (5.6)       | 7.2 (6.1)                                             | -                                                                       | 7.2 (6.1)       | 4.6 (5.0)                                              | 5.5 (3.6)                                                                | 4.7 (4.9)       |
| <b>SABA canisters or inhalers per patient prescribed in the past year, n (%)</b> |                 |                                                       |                                                                         |                 |                                                        |                                                                          |                 |
| 1–2                                                                              | 196 (46.4)      | 71 (39.4)                                             | 0 (0)                                                                   | 71 (39.4)       | 117 (52.7)                                             | 6 (35.3)                                                                 | 123 (51.5)      |
| 3–5                                                                              | 56 (13.3)       | 15 (8.3)                                              | 0 (0)                                                                   | 15 (8.3)        | 40 (18.0)                                              | 1 (5.9)                                                                  | 41 (17.2)       |
| 6–9                                                                              | 44 (10.4)       | 13 (7.2)                                              | 0 (0)                                                                   | 13 (7.2)        | 23 (10.4)                                              | 7 (41.2)                                                                 | 30 (12.6)       |
| 10–12                                                                            | 107 (25.4)      | 69 (38.3)                                             | 0 (0)                                                                   | 69 (38.3)       | 35 (15.8)                                              | 3 (17.6)                                                                 | 38 (15.9)       |
| ≥13                                                                              | 19 (4.5)        | 12 (6.7)                                              | 0 (0)                                                                   | 12 (6.7)        | 7 (3.2)                                                | 0 (0)                                                                    | 7 (2.9)         |
| Missing data                                                                     | 6               | 3                                                     | 0                                                                       | 3               | 2                                                      | 1                                                                        | 3               |
| Total                                                                            | 422 (100.0)     | 180 (100.0)                                           | 0 (0)                                                                   | 180 (100.0)     | 222 (100.0)                                            | 17 (100.0)                                                               | 239 (100.0)     |
| <b>Patients prescribed SABA in addition to maintenance therapy, n (%)</b>        |                 |                                                       |                                                                         |                 |                                                        |                                                                          |                 |
| Yes                                                                              | 4847 (58.0)     | 402 (54.1)                                            | 386 (55.5)                                                              | 788 (54.7)      | 644 (53.2)                                             | 3395 (60.0)                                                              | 4039 (58.8)     |
| No                                                                               | 3504 (42.0)     | 341 (45.9)                                            | 309 (44.5)                                                              | 652 (45.3)      | 566 (46.8)                                             | 2265 (40.0)                                                              | 2833 (41.2)     |

|                                                                                  | All<br>(n=8351) | Primary care<br>(n=1440)                              |                                                                         |                 | Specialists<br>(n=6872)                                |                                                                          |                 |
|----------------------------------------------------------------------------------|-----------------|-------------------------------------------------------|-------------------------------------------------------------------------|-----------------|--------------------------------------------------------|--------------------------------------------------------------------------|-----------------|
|                                                                                  |                 | Investigator-<br>classified mild<br>asthma<br>(n=743) | Investigator-<br>classified<br>moderate-to-<br>severe asthma<br>(n=695) | All<br>(n=1440) | Investigator-<br>classified mild<br>asthma<br>(n=1210) | Investigator-<br>classified<br>moderate-to-<br>severe asthma<br>(n=5660) | All<br>(n=6872) |
| <b>Number of canisters or inhalers per patient prescribed in the past year</b>   |                 |                                                       |                                                                         |                 |                                                        |                                                                          |                 |
| Number of patients                                                               | 4649            | 401                                                   | 355                                                                     | 756             | 631                                                    | 3244                                                                     | 3875            |
| Mean (SD)                                                                        | 6.5 (8.6)       | 6.7 (4.7)                                             | 8.1 (14.1)                                                              | 7.4 (10.3)      | 6.7 (6.0)                                              | 6.2 (8.5)                                                                | 6.3 (8.1)       |
| Missing data, n (%)                                                              | 198 (4.1)       | 1 (0.2)                                               | 31 (8.0)                                                                | 32 (4.1)        | 13 (2.0)                                               | 151 (4.4)                                                                | 164 (4.1)       |
| <b>SABA canisters or inhalers per patient prescribed in the past year, n (%)</b> |                 |                                                       |                                                                         |                 |                                                        |                                                                          |                 |
| 1–2                                                                              | 1780 (38.3)     | 113 (28.2)                                            | 121 (34.1)                                                              | 234 (31)        | 246 (39)                                               | 1295 (39.9)                                                              | 1541 (39.8)     |
| 3–5                                                                              | 856 (18.4)      | 71 (17.7)                                             | 45 (12.7)                                                               | 116 (15.3)      | 83 (13.2)                                              | 653 (20.1)                                                               | 736 (19.0)      |
| 6–9                                                                              | 653 (14.0)      | 76 (19.0)                                             | 41 (11.5)                                                               | 117 (15.5)      | 59 (9.4)                                               | 473 (14.6)                                                               | 532 (13.7)      |
| 10–12                                                                            | 1041 (22.4)     | 124 (30.9)                                            | 132 (37.2)                                                              | 256 (33.9)      | 221 (35.0)                                             | 561 (17.3)                                                               | 782 (20.2)      |
| ≥13                                                                              | 319 (6.9)       | 17 (4.2)                                              | 16 (4.5)                                                                | 33 (4.4)        | 22 (3.5)                                               | 262 (8.1)                                                                | 284 (7.3)       |
| Missing data                                                                     | 198             | 1                                                     | 31                                                                      | 32              | 13                                                     | 151                                                                      | 164             |
| Total                                                                            | 4649 (100.0)    | 401 (100.0)                                           | 355 (100.0)                                                             | 756 (100.0)     | 631 (100.0)                                            | 3244 (100.0)                                                             | 3875 (100.0)    |
| <b>Patients prescribed ICS monotherapy,* n (%)</b>                               |                 |                                                       |                                                                         |                 |                                                        |                                                                          |                 |
| Yes                                                                              | 1473 (17.6)     | 403 (54.2)                                            | 44 (6.3)                                                                | 447 (31.0)      | 627 (51.8)                                             | 395 (7.0)                                                                | 1022 (14.9)     |
| No                                                                               | 6878 (82.4)     | 340 (45.8)                                            | 651 (93.7)                                                              | 993 (69.0)      | 583 (48.2)                                             | 5265 (93.0)                                                              | 5850 (85.1)     |
| <b>Daily ICS dose prescribed (patients [%])</b>                                  |                 |                                                       |                                                                         |                 |                                                        |                                                                          |                 |
| Low dose                                                                         | 556 (38.3)      | 132 (32.9)                                            | 10 (25.6)                                                               | 142 (32.3)      | 309 (49.8)                                             | 104 (26.7)                                                               | 413 (40.9)      |
| Medium dose                                                                      | 689 (47.4)      | 231 (57.6)                                            | 27 (69.2)                                                               | 258 (58.6)      | 263 (42.4)                                             | 167 (42.9)                                                               | 430 (42.6)      |
| High dose                                                                        | 208 (14.3)      | 38 (9.5)                                              | 2 (5.1)                                                                 | 40 (9.1)        | 48 (7.7)                                               | 118 (30.3)                                                               | 166 (16.5)      |
| Missing values                                                                   | 20              | 2                                                     | 5                                                                       | 7               | 7                                                      | 6                                                                        | 13              |

|                                                                               | All<br>(n=8351) | Primary care<br>(n=1440)                              |                                                                         |                 | Specialists<br>(n=6872)                                |                                                                          |                 |
|-------------------------------------------------------------------------------|-----------------|-------------------------------------------------------|-------------------------------------------------------------------------|-----------------|--------------------------------------------------------|--------------------------------------------------------------------------|-----------------|
|                                                                               |                 | Investigator-<br>classified mild<br>asthma<br>(n=743) | Investigator-<br>classified<br>moderate-to-<br>severe asthma<br>(n=695) | All<br>(n=1440) | Investigator-<br>classified mild<br>asthma<br>(n=1210) | Investigator-<br>classified<br>moderate-to-<br>severe asthma<br>(n=5660) | All<br>(n=6872) |
| Total                                                                         | 1453 (100.0)    | 401 (100.0)                                           | 39 (100.0)                                                              | 440 (100.0)     | 620 (100.0)                                            | 389 (100.0)                                                              | 1009 (100.0)    |
| <b>ICS canisters or inhalers per patient prescribed in the past 12 months</b> |                 |                                                       |                                                                         |                 |                                                        |                                                                          |                 |
| Number of patients                                                            | 1460            | 402                                                   | 39                                                                      | 441             | 625                                                    | 390                                                                      | 1015            |
| Mean (SD)                                                                     | 8.1 (8.7)       | 7.5 (7.2)                                             | 4.8 (4.1)                                                               | 7.2 (7.0)       | 8.3 (10.1)                                             | 8.6 (8.0)                                                                | 8.4 (9.3)       |
| Missing values, n<br>(%)                                                      | 13 (0.9)        | 1 (0.2)                                               | 5 (12.8)                                                                | 6 (1.4)         | 2 (0.3)                                                | 5 (1.3)                                                                  | 7 (0.7)         |

\*ICS monotherapy – ICS alone as controller treatment.

ICS: inhaled corticosteroid; SABA: short-acting  $\beta_2$ -agonist; SD: standard deviation.

**SUPPLEMENTARY TABLE E3** Asthma treatments in patients with 0 SABA prescriptions (n=3076)

| Asthma treatments                                  | Patients with 0 SABA canister prescriptions, n=3076 |                |
|----------------------------------------------------|-----------------------------------------------------|----------------|
|                                                    | Number of patients, n (%)                           | Missing values |
| <b>SABA OTC</b>                                    | 349 (11.4)                                          | 3              |
| <b>ICS monotherapy prescriptions</b>               | 219 (7.1)                                           | 0              |
| <b>ICS/LABA combination prescriptions</b>          | 2743 (89.2)                                         | 1              |
| <b>OCS short-course prescriptions</b>              | 780 (25.4)                                          | 5              |
| <b>OCS long-term prescriptions</b>                 | 129 (4.2)                                           | 4              |
| <b>Other treatments</b>                            | 70 (2.3)                                            | -              |
| Nebulised SABA                                     | 16                                                  | -              |
| Oral SABA                                          | 2                                                   | -              |
| LTRAs                                              | 10                                                  | -              |
| Nebulised SAMA/SABA                                | 2                                                   | -              |
| Theophylline                                       | 1                                                   | -              |
| Others*                                            | 39                                                  | -              |
| No other medication/other medication not specified | 44 (1.4)                                            | -              |

\*Others included various combinations of LTRA, LAMAs, biologics, antibiotics, anti-allergic medication, nebulised SABA/SAMA and OCS.

ICS: inhaled corticosteroid; LABA: long-acting  $\beta_2$ -agonist; LAMA: long-acting muscarinic antagonist; LTRA: leukotriene receptor antagonist; OCS: oral corticosteroid; OTC: over the counter; SABA: short-acting  $\beta_2$ -agonist; SAMA: short-acting muscarinic antagonist.

**SUPPLEMENTARY TABLE E4** Demographics and disease characteristics of patients with 0 vs  $\geq 1$  SABA prescription (secondary analysis dataset)

|                                                       | <b>All patients<br/>(n=8351)</b> | <b>Patients with 0<br/>SABA<br/>prescriptions<br/>(n=2642)*</b> | <b>Patients with <math>\geq 1</math><br/>SABA<br/>prescription<br/>(n=4597)</b> |
|-------------------------------------------------------|----------------------------------|-----------------------------------------------------------------|---------------------------------------------------------------------------------|
| <b>Age (years)</b>                                    |                                  |                                                                 |                                                                                 |
| n                                                     | 8351                             | 2642                                                            | 4597                                                                            |
| Mean (range)                                          | 49.4 (12.0–95.0)                 | 48.9 (12.0–95.0)                                                | 49.1 (12.0–93.0)                                                                |
| <b>Sex, n (%)</b>                                     |                                  |                                                                 |                                                                                 |
| Female                                                | 5691 (68.1)                      | 1714 (64.9)                                                     | 3199 (69.6)                                                                     |
| <b>BMI (kg/m<sup>2</sup>)</b>                         |                                  |                                                                 |                                                                                 |
| Mean (SD)                                             | 27.8 (6.19)                      | 27.3 (6.0)                                                      | 28.1 (6.3)                                                                      |
| <b>Education level, n (%)</b>                         |                                  |                                                                 |                                                                                 |
| Primary or secondary school                           | 2877 (34.5)                      | 887 (33.6)                                                      | 1806 (39.3)                                                                     |
| High school                                           | 2013 (24.1)                      | 686 (26.0)                                                      | 1208 (26.3)                                                                     |
| University and/or post-university                     | 2792 (33.4)                      | 1069 (40.5)                                                     | 1583 (34.4)                                                                     |
| Not established                                       | 668 (8.0)                        | 0 (0.0)                                                         | 0 (0.0)                                                                         |
| Missing data                                          | 1                                | 0                                                               | 0                                                                               |
| <b>Healthcare insurance/medication funding, n (%)</b> |                                  |                                                                 |                                                                                 |
| Not reimbursed                                        | 2281 (27.3)                      | 864 (32.7)                                                      | 1258 (27.4)                                                                     |
| Partially reimbursed                                  | 1851 (22.2)                      | 637 (24.1)                                                      | 985 (21.4)                                                                      |
| Fully reimbursed                                      | 3940 (47.2)                      | 1141 (43.2)                                                     | 2354 (51.2)                                                                     |
| Missing data                                          | 3                                | 0                                                               | 0                                                                               |
| <b>Smoking status history, n (%)</b>                  |                                  |                                                                 |                                                                                 |
| Active smoker                                         | 497 (6.0)                        | 154 (5.8)                                                       | 255 (5.5)                                                                       |
| Former smoker                                         | 1105 (13.2)                      | 348 (13.2)                                                      | 608 (13.2)                                                                      |
| Never smoker                                          | 6747 (80.8)                      | 2140 (81)                                                       | 3734 (81.2)                                                                     |
| Missing data                                          | 2                                | 0                                                               | 0                                                                               |
| <b>Comorbidities, n (%)</b>                           |                                  |                                                                 |                                                                                 |
| None                                                  | 2962 (35.5)                      | 1027 (38.9)                                                     | 1587 (34.5)                                                                     |
| 1–2                                                   | 3900 (46.7)                      | 1216 (46)                                                       | 2170 (47.2)                                                                     |
| 3–4                                                   | 1228 (14.7)                      | 329 (12.5)                                                      | 700 (15.2)                                                                      |
| $\geq 5$                                              | 261 (3.1)                        | 70 (2.6)                                                        | 140 (3.0)                                                                       |
| <b>Asthma duration (years)</b>                        |                                  |                                                                 |                                                                                 |
| Mean (SD)                                             | 14.9 (14.3)                      | 12.2 (13.5)                                                     | 17.1 (14.9)                                                                     |
| Median (min, max)                                     | 10.0 (1.0, 85.0)                 | 7.0 (1.0, 83.0)                                                 | 12.0 (1.0, 85.0)                                                                |
| <b>GINA classification, n (%)</b>                     |                                  |                                                                 |                                                                                 |
| Step 1                                                | 714 (8.5)                        | 226 (8.6)                                                       | 438 (9.5)                                                                       |
| Step 2                                                | 1244 (14.9)                      | 230 (8.7)                                                       | 929 (20.2)                                                                      |
| Step 3                                                | 2279 (27.3)                      | 917 (34.7)                                                      | 1038 (22.6)                                                                     |
| Step 4                                                | 2872 (34.4)                      | 970 (36.7)                                                      | 1518 (33)                                                                       |

|              | <b>All patients<br/>(n=8351)</b> | <b>Patients with 0<br/>SABA<br/>prescriptions<br/>(n=2642)*</b> | <b>Patients with ≥1<br/>SABA<br/>prescription<br/>(n=4597)</b> |
|--------------|----------------------------------|-----------------------------------------------------------------|----------------------------------------------------------------|
| Step 5       | 1237 (14.8)                      | 299 (11.3)                                                      | 674 (14.7)                                                     |
| Missing data | 5                                | 0                                                               | 0                                                              |

\*Among the 7239 patients in the secondary analysis population (excluding patients with various modelling parameters missing), 2646 patients had 0 SABA prescriptions.

BMI: body mass index; GINA: Global Initiative for Asthma; max: maximum; min: minimum; SABA: short-acting  $\beta_2$ -agonist; SD: standard deviation.

**SUPPLEMENTARY TABLE E5** Severe asthma exacerbations in patients with 0 vs  $\geq 1$  SABA prescription (secondary analysis dataset)

|                                                                      | <b>All patients<br/>(n=8351)</b> | <b>Patients with 0 SABA<br/>prescriptions<br/>(n=2642)*</b> | <b>Patients with <math>\geq 1</math> SABA<br/>prescription<br/>(n=4597)</b> |
|----------------------------------------------------------------------|----------------------------------|-------------------------------------------------------------|-----------------------------------------------------------------------------|
| <b>Number of severe asthma exacerbations in the last year</b>        |                                  |                                                             |                                                                             |
| Mean (SD)                                                            | 1.1 (2.09)                       | 0.8 (1.8)                                                   | 1.2 (2.3)                                                                   |
| <b>Severe asthma exacerbations in the last year by groups, n (%)</b> |                                  |                                                             |                                                                             |
| 0 exacerbations                                                      | 4555 (54.5)                      | 1716 (65.0)                                                 | 2271 (49.4)                                                                 |
| 1 exacerbation                                                       | 1810 (21.7)                      | 486 (18.4)                                                  | 1088 (23.7)                                                                 |
| 2 exacerbations                                                      | 892 (10.7)                       | 200 (7.6)                                                   | 555 (12.1)                                                                  |
| 3 exacerbations                                                      | 493 (5.9)                        | 117 (4.4)                                                   | 297 (6.5)                                                                   |
| >3 exacerbations                                                     | 600 (7.2)                        | 123 (4.7)                                                   | 385 (8.4)                                                                   |
| Missing data                                                         | 1                                | 0                                                           | 1                                                                           |

\*Among the 7239 patients in the secondary analysis population (excluding patients with various modelling parameters missing), 2646 patients had 0 SABA prescriptions.

SABA: short-acting  $\beta_2$ -agonist; SD: standard deviation.



**SUPPLEMENTARY TABLE E6** Other asthma treatments prescribed in the past 12 months

|                                                                       | All<br>(n=8351) | Primary care<br>(n=1440)                              |                                                                            |                 | Specialists<br>(n=6872)                                |                                                                             |                 |
|-----------------------------------------------------------------------|-----------------|-------------------------------------------------------|----------------------------------------------------------------------------|-----------------|--------------------------------------------------------|-----------------------------------------------------------------------------|-----------------|
|                                                                       |                 | Investigator-<br>classified<br>mild asthma<br>(n=743) | Investigator-<br>classified<br>moderate-to-<br>severe<br>asthma<br>(n=695) | All<br>(n=1440) | Investigator-<br>classified<br>mild asthma<br>(n=1210) | Investigator-<br>classified<br>moderate-to-<br>severe<br>asthma<br>(n=5660) | All<br>(n=6872) |
| <b>Patients prescribed ICS/LABA combination, n (%)</b>                |                 |                                                       |                                                                            |                 |                                                        |                                                                             |                 |
| Yes                                                                   | 6610 (79.2)     | 34 (4.6)                                              | 675 (97.3)                                                                 | 711 (49.4)      | 297 (24.5)                                             | 5566 (98.4)                                                                 | 5865 (85.4)     |
| No                                                                    | 1735 (20.8)     | 709 (95.4)                                            | 19 (2.7)                                                                   | 728 (50.6)      | 913 (75.5)                                             | 89 (1.6)                                                                    | 1002 (14.6)     |
| Missing values                                                        | 6               | 0                                                     | 1                                                                          | 1               | 0                                                      | 5                                                                           | 5               |
| Total                                                                 | 8345 (100.0)    | 743 (100.0)                                           | 694 (100.0)                                                                | 1439 (100.0)    | 1210 (100.0)                                           | 5655 (100.0)                                                                | 6867 (100.0)    |
| <b><i>Prescribed daily ICS dose in combination (patients [%])</i></b> |                 |                                                       |                                                                            |                 |                                                        |                                                                             |                 |
| Low dose                                                              | 2066 (31.4)     | 26 (78.8)                                             | 324 (48.2)                                                                 | 350 (49.5)      | 170 (58.4)                                             | 1538 (27.8)                                                                 | 1710 (29.3)     |
| Medium dose                                                           | 3214 (48.9)     | 5 (15.2)                                              | 279 (41.5)                                                                 | 286 (40.5)      | 106 (36.4)                                             | 2804 (50.6)                                                                 | 2910 (49.9)     |
| High dose                                                             | 1292 (19.7)     | 2 (6.1)                                               | 69 (10.3)                                                                  | 71 (10.0)       | 15 (5.2)                                               | 1197 (21.6)                                                                 | 1212 (20.8)     |
| Missing values                                                        | 38              | 1                                                     | 3                                                                          | 4               | 6                                                      | 27                                                                          | 33              |
| Total                                                                 | 6572 (100.0)    | 33 (100.0)                                            | 672 (100.0)                                                                | 707 (100.0)     | 291 (100.0)                                            | 5539 (100.0)                                                                | 5832 (100.0)    |
| <b>Patients prescribed OCS burst/short course, n (%)</b>              |                 |                                                       |                                                                            |                 |                                                        |                                                                             |                 |
| Yes                                                                   | 2654 (31.8)     | 152 (20.5)                                            | 157 (22.6)                                                                 | 309 (21.5)      | 257 (21.3)                                             | 2071 (36.7)                                                                 | 2329 (34.0)     |
| No                                                                    | 5683 (68.2)     | 590 (79.5)                                            | 537 (77.4)                                                                 | 1129 (78.5)     | 951 (78.7)                                             | 3579 (63.3)                                                                 | 4531 (66.0)     |
| Missing values                                                        | 14              | 1                                                     | 1                                                                          | 2               | 2                                                      | 10                                                                          | 12              |
| Total                                                                 | 8337 (100.0)    | 742 (100.0)                                           | 694 (100.0)                                                                | 1438 (100.0)    | 1208 (100.0)                                           | 5650 (100.0)                                                                | 6860 (100.0)    |

|                                                             | All<br>(n=8351) | Primary care<br>(n=1440)                              |                                                                            |                 | Specialists<br>(n=6872)                                |                                                                             |                 |
|-------------------------------------------------------------|-----------------|-------------------------------------------------------|----------------------------------------------------------------------------|-----------------|--------------------------------------------------------|-----------------------------------------------------------------------------|-----------------|
|                                                             |                 | Investigator-<br>classified<br>mild asthma<br>(n=743) | Investigator-<br>classified<br>moderate-to-<br>severe<br>asthma<br>(n=695) | All<br>(n=1440) | Investigator-<br>classified<br>mild asthma<br>(n=1210) | Investigator-<br>classified<br>moderate-to-<br>severe<br>asthma<br>(n=5660) | All<br>(n=6872) |
| <b>Patients prescribed OCS maintenance treatment, n (%)</b> |                 |                                                       |                                                                            |                 |                                                        |                                                                             |                 |
| Yes                                                         | 482 (5.8)       | 28 (3.8)                                              | 13 (1.9)                                                                   | 41 (2.8)        | 51 (4.2)                                               | 387 (6.8)                                                                   | 438 (6.4)       |
| No                                                          | 7858 (94.2)     | 715 (96.2)                                            | 681 (98.1)                                                                 | 1398 (97.2)     | 1157 (95.8)                                            | 5266 (93.2)                                                                 | 6424 (93.6)     |
| Missing values                                              | 11              | 0                                                     | 1                                                                          | 1               | 2                                                      | 7                                                                           | 10              |
| Total                                                       | 8340 (100.0)    | 743 (100.0)                                           | 694 (100.0)                                                                | 1439 (100.0)    | 1208 (100.0)                                           | 5653 (100.0)                                                                | 6862 (100.0)    |
| <b>Patients prescribed antibiotics (for asthma), n (%)</b>  |                 |                                                       |                                                                            |                 |                                                        |                                                                             |                 |
| Yes                                                         | 1656 (20.0)     | 64 (8.7)                                              | 92 (13.3)                                                                  | 157 (11.0)      | 149 (12.4)                                             | 1346 (24.1)                                                                 | 1495 (22.0)     |
| No                                                          | 6606 (80.0)     | 672 (91.3)                                            | 600 (86.7)                                                                 | 1273 (89.0)     | 1050 (87.6)                                            | 4246 (75.9)                                                                 | 5298 (78.0)     |
| Missing values                                              | 89              | 7                                                     | 3                                                                          | 10              | 11                                                     | 68                                                                          | 79              |
| Total                                                       | 8262 (100.0)    | 736 (100.0)                                           | 692 (100.0)                                                                | 1430 (100.0)    | 1199 (100.0)                                           | 5592 (100.0)                                                                | 6793 (100.0)    |

ICS: inhaled corticosteroid; LABA: long-acting  $\beta_2$ -agonist; OCS: oral corticosteroid.

**SUPPLEMENTARY TABLE E7** Severe exacerbations and level of asthma symptom control across SABA canister prescription categories

|                                                                        | SABA canister prescriptions in the past 12 months |                  |                  |                    |                  | Total          |
|------------------------------------------------------------------------|---------------------------------------------------|------------------|------------------|--------------------|------------------|----------------|
|                                                                        | 1–2<br>canisters                                  | 3–5<br>canisters | 6–9<br>canisters | 10–12<br>canisters | ≥13<br>canisters |                |
| <b>Patients with severe exacerbations in the past 12 months, n (%)</b> |                                                   |                  |                  |                    |                  |                |
| 0 severe exacerbations                                                 | 1071<br>(59.1)                                    | 342<br>(40.6)    | 269<br>(42.9)    | 501<br>(47.2)      | 88<br>(32.6)     | 2271<br>(49.2) |
| 1 severe exacerbation                                                  | 378<br>(20.9)                                     | 249<br>(29.5)    | 165<br>(26.3)    | 255<br>(24.0)      | 41<br>(15.2)     | 1088<br>(23.6) |
| 2 severe exacerbations                                                 | 163<br>(9.0)                                      | 127<br>(15.1)    | 91<br>(14.5)     | 134<br>(12.6)      | 44<br>(16.3)     | 559<br>(12.1)  |
| ≥3 severe exacerbations                                                | 199<br>(11.0)                                     | 125<br>(14.8)    | 102<br>(16.3)    | 171<br>(16.1)      | 97<br>(35.9)     | 694<br>(15.0)  |
| Total                                                                  | 1811                                              | 843              | 627              | 1061               | 270              | 4612           |
| <b>Level of asthma symptom control, n (%)</b>                          |                                                   |                  |                  |                    |                  |                |
| Patients with uncontrolled asthma                                      | 382<br>(21.3)                                     | 252<br>(29.9)    | 208<br>(33.2)    | 396<br>(37.3)      | 131<br>(48.5)    | 1369<br>(29.8) |
| Patients with at least partly controlled asthma                        | 1414<br>(78.7)                                    | 590<br>(70.1)    | 419<br>(66.8)    | 666<br>(62.7)      | 139<br>(51.5)    | 3228<br>(70.2) |
| Total                                                                  | 1796                                              | 842              | 627              | 1062               | 270              | 4597           |

SABA: short-acting  $\beta_2$ -agonist.

**SUPPLEMENTARY TABLE E8** Unadjusted analysis: association of SABA prescriptions with severe exacerbations in the past 12 months and level of asthma symptom control

| SABA canister prescriptions in the past 12 months | Rate of severe exacerbations |           |         | Odds of at least partly controlled asthma |           |         |
|---------------------------------------------------|------------------------------|-----------|---------|-------------------------------------------|-----------|---------|
|                                                   | IRR                          | 95% CI    | p-value | OR                                        | 95% CI    | p-value |
| 1–2 canisters                                     | <i>Reference</i>             |           |         | <i>Reference</i>                          |           |         |
| 3–5 canisters                                     | 1.40                         | 1.23–1.58 | <0.0001 | 0.63                                      | 0.53–0.76 | <0.0001 |
| 6–9 canisters                                     | 1.45                         | 1.27–1.67 | <0.0001 | 0.54                                      | 0.45–0.67 | <0.0001 |
| 10–12 canisters                                   | 1.56                         | 1.39–1.75 | <0.0001 | 0.45                                      | 0.38–0.54 | <0.0001 |
| ≥13 canisters                                     | 2.71                         | 2.27–3.25 | <0.0001 | 0.29                                      | 0.22–0.37 | <0.0001 |

CI: confidence interval; IRR: incidence rate ratio; OR: odds ratio; SABA: short-acting  $\beta_2$ -agonist.
